# Supplementary material
Source: publisher figshare collection journal article supplement (https://gsapubs.figshare.com/ndownloader/files/22410489)
Supplement: Supplementary file 1 [file 22410489]

***Supplementary Material: Paleotethys slab pull, self-lubricated weak lithospheric zones,  
poloidal and toroidal plate motions, and Gondwana tectonics.***

***Geosphere, doi:10.1130/GES01444.1.***

***Haroldo Vizán, Claudia Beatriz Prezzi, Silvana Evangelina Geuna, María Silvia Japas,***

***Emiliano Manuel Renda, Juan Franzese and María Andrea Van Zele***

To carry out the paleogeographic reconstructions, it was considered that Gondwana should have been made up by distinct domains separated by deformed zones composed of fault systems as pointed out in the main text (see also Fig.1).

Paleomagnetic poles (PP's) for paleogeographic reconstructions of this study (Table 1 SM) were selected from previous databases (Clark and Lackie 2003, Geuna *et al.* 2010, Kent and Irving 2010, Torsvik *et al.* 2012) where they had been classified according to Van der Voo (1993)'s reliability criteria.

**Table 1 SM: Paleomagnetic poles selected for Gondwana**

Lat/Lon = Pole Latitude/Longitude. A<sub>95</sub>: 95% confidence oval. In references GPMDB: paleomagnetic poles listed in global paleomagnetic data base; T: selected by Torsvik *et al.* (2012) from the GPMDB.

Paleomagnetic poles for the Early Pennsylvanian-Early Guadalupian time span (ca 320 Ma – 270 Ma).

| South America                         |            |           |                     |          |                                   |
|---------------------------------------|------------|-----------|---------------------|----------|-----------------------------------|
| Locality or Stratigraphic unit        | Lon. (° E) | Lat. (°S) | A <sub>95</sub> (°) | Age (Ma) | References                        |
| Tepuel Group, Argentina               | 307.14     | 36.88     | 16.3                | 325      | GPMDB 2805, 7252                  |
| Lower units of Paganzo Gr., Argentina | 327.57     | 57.73     | 6.4                 | 310      | Geuna <i>et al.</i> , 2010 (1)    |
| Pular and Cas Formations, Chile       | 350.0      | 57.0      | 9.6                 | 310      | GPMDB 1420, T                     |
| Santa Fe Group, Brazil                | 324.0      | 53.2      | 4.1                 | 300      | Brandt <i>et al.</i> (2009)       |
| La Tabla Formation, Chile             | 347.0      | 51.0      | 5.7                 | 290      | GPMDB 1420, 597                   |
| Copacabana Group, Perú                | 321.3      | 68.2      | 5.2                 | 287      | Rakotosolofa <i>et al.</i> (2006) |

|                                                   |       |      |     |     |                             |
|---------------------------------------------------|-------|------|-----|-----|-----------------------------|
| Africa                                            |       |      |     |     |                             |
| Oubarakat and El-Adeb Larache Formations, Algeria | 47.8  | 20.3 | 4.5 | 317 | GPMDDB 3484, 8867           |
| Dwyka Group, South Africa                         | 53.6  | 25.2 | 12  | 315 | GPMDDB 3489, 8894           |
| Lower El Adeb Larache Formations, Algeria         | 48.3  | 21.1 | 4.6 | 307 | GPMDDB 2540, 6529           |
| Harsi Barchir Formation, Algeria                  | 49.9  | 27.8 | 2.6 | 310 | Derder <i>et al.</i> (2009) |
| deIllizi Basin Sediments, Algeria                 | 51.5  | 21.1 | 4.6 | 309 | Derder <i>et al.</i> (2001) |
| Djebel Tarhat red beds, Morocco                   | 62.3  | 23.3 | 7.8 | 285 | GPMDDB 1080, 2037           |
| Chougrane red beds, Morocco                       | 66.4  | 33.4 | 4.7 | 285 | GPMDDB 723, 2279            |
| Taztot trachyandesites, Morocco                   | 56.8  | 38.7 | 4.6 | 285 | GPMDDB 723, 2280            |
| Abadla Formation, Moroco                          | 54.2  | 26.3 | 3.6 | 279 | GPMDDB 3275, T              |
| Abadla Serie, Algeria                             | 56.5  | 26.8 | 3.6 | 273 | GPMDDB 1459, T              |
| Australia                                         |       |      |     |     |                             |
| Connors Volcanics                                 | 100.0 | 46.0 | 14  | 315 | GPMDDB 3265, 8406           |
| NewcastleRange                                    | 124.5 | 63.8 | 7.6 | 320 | GPMDDB 3561, 9056           |
| Upper Clifden/Lower Rocky Creek Formations        | 95.3  | 49.6 | 11  | 317 | GPMDDB 3463, 8818           |
| Lark Hill Formation                               | 127.0 | 50.4 | 6.7 | 310 | GPMDDB 3463, 8822           |
| Rocky Creek                                       | 136.5 | 57.6 | 9   | 307 | GPMDDB 3463,                |

|                                   |       |       |     |     |                             |
|-----------------------------------|-------|-------|-----|-----|-----------------------------|
| Conglomerate                      |       |       |     |     | 8821                        |
| Featherbed<br>Volcanics           | 131.7 | 43.0  | 8.5 | 292 | GPMDDB 3266,<br>8412        |
| Mt.Leyshon and<br>Tuckers Complex | 139.7 | 44.89 | 4.2 | 285 | Clark and<br>Lackie 2003(2) |

(1) Re-calculated taken the data of Lower Paganzo Gr. from Geuna *et al.* (2010).

(2) Re-calculated taken the data from Clark and Lackie (2003).

Mean paleomagnetic pole for Gondwana in Africa geographic coordinates: N=22 Lon= 54.4° E, Lat= 27.0° S, R= 21.64, A<sub>95</sub>= 4.1°, K= 57.9

Paleomagnetic poles for the Late Guadalupian-Middle Triassic time span (ca. 270 Ma – 260 Ma).

| Locality or Stratigraphic unit                 | Lon. (° E) | Lat. (°S) | A <sub>95</sub> (°) | Age (Ma) | References                    |
|------------------------------------------------|------------|-----------|---------------------|----------|-------------------------------|
| South America                                  |            |           |                     |          |                               |
| Independencia Group, Paraguay                  | 325.5      | 70.7      | 6.6                 | 255      | Rapalini <i>et al.</i> (2006) |
| Tambillos Formation, Argentina                 | 308.3      | 80.6      | 5.2                 | 260      | GPMDDB 2475, 6376             |
| Upper Choiyoi, Argentina                       | 326        | 75.5      | 4.1                 | 264      | Domeier <i>et al.</i> (2012b) |
| Puesto Viejo Fm., sedimentary rocks, Argentina | 293.5      | 75.1      | 4.9                 | 245      | Domeier <i>et al.</i> (2012b) |
| Puesto Viejo Fm., Volcanic rocks, Argentina    | 313.4      | 76        | 6.4                 | 245      | Domeier <i>et al.</i> (2012b) |
| Amana Fm., Argentina                           | 298.5      | 69.1      | 7                   | 240      | GPMDDB 1132, T                |
| Africa                                         |            |           |                     |          |                               |
| Casanje Series, South Africa                   | 62.2       | 49.0      | 6                   | 248      | GPMDDB 1960, T                |
| Komandodrifdam Interval, Karoo basin,          | 63.8       | 48.0      | 7.6                 | 251      | De Kock and Kirschvink        |

|                                           |       |       |     |       |                          |
|-------------------------------------------|-------|-------|-----|-------|--------------------------|
| South Africa                              |       |       |     |       | (2004)                   |
| Madagascar                                |       |       |     |       |                          |
| Sakamena Group<br>(Combined)              | 73.5  | 68.4  | 7.6 | 250.5 | GPMDDB<br>3329, T        |
| India                                     |       |       |     |       |                          |
| Khamthi Red Beds,<br>Central India        | 295.1 | 9.5   | 6.5 | 250.5 | GPMDDB 163,<br>T         |
| Wargal and Chidru,<br>Pakistan Formations | 274.5 | 10.2  | 1.8 | 250.5 | GPMDDB<br>2467, T        |
| Panchet , Karanpura<br>Series             | 289.1 | 13.4  | 6   | 248.5 | GPMDDB 162,<br>T         |
| Mangli Strata, Central<br>India           | 290.9 | 12.2  | 4.6 | 243   | GPMDDB 593,<br>T         |
| Australia                                 |       |       |     |       |                          |
| Gerringong Volcanics                      | 132.0 | 44.0  | 11  | 255   | GPMDDB 995,<br>1852      |
| Upper Marine Latites                      | 136.0 | 46.0  | 15  | 253   | GPMDDB<br>995,1852       |
| Dundee Ignimbrites and<br>rhyodacites     | 146.4 | 34.19 | 6   | 247   | Lackie (1988)<br><br>(1) |
| Patonga Claystones                        | 148.5 | 31.6  | 7.8 | 240   | GPMDDB<br>1610,1096      |

(1) Re-calculated taken the data of both volcanic units from Lackie (1988).

Mean paleomagnetic pole for Gondwana in Africa geographic coordinates. N= 17, Lon= 56.2° E, Lat= 58.2° S, R= 16.82,  $A_{95}$ = 3.8°, K= 87.7.

Paleomagnetic poles for the Late Triassic-early Late Jurassic time span (ca 230 Ma – 160 Ma)

| Locality or Stratigraphic unit | Lon. (° E) | Lat. (°S) | A <sub>95</sub> (°) | Age (Ma) | References                      |
|--------------------------------|------------|-----------|---------------------|----------|---------------------------------|
| South America                  |            |           |                     |          |                                 |
| Bolivar Dykes, Venezuela       | 245.6      | 66.9      | 4.9                 | 203      | MacDonald and Opdyke (1974), T  |
| Cacipore dikes, Brazil         | 208.6      | 79.8      | 5.2                 | 200      | Ernesto et al. (2003)           |
| Roraima dikes, Brazil          | 235.1      | 80.1      | 6.6                 | 199      | Marzoli et al. (1999)           |
| French Guyana dikes            | 235.1      | 81.2      | 4.0                 | 198      | Nomade et al. (2000)            |
| NE Brazil magmatism-2          | 223.9      | 78.1      | 5.2                 | 198      | Ernesto et al. (2003)           |
| Anari-Tapirapua Fm., Brazil    | 250.3      | 65.5      | 3.6                 | 197      | Montes – Lauar et al. (1994), T |
| South America, CAMP            | 237.6      | 75.9      | 6.8                 |          | Kent and Irving (2010)          |
| Marifil Fm., Patagonia         | 138        | 83        | 11                  | 183      | Iglesia Llanos et al. (2003), T |
| Chon Aike recal., Patagonia    | 197        | 85        | 13.5                | 167      | Vizán (1998), T                 |
| Africa                         |            |           |                     |          |                                 |
| Karoo Lavas                    | 98.3       | 69.2      | 3.3                 | 183      | Hargraves et al. (1997)         |
| Freetown Complex, Sierra Leone | 32.7       | 82.9      | 5.6                 | 193      | Hargraves et al. (1999), T      |
| Hodh volc., South Mauritania   | 60.2       | 71.4      | 6.1                 | 187      | Sichler et al. (1980), T        |
| Hank volc., North Mauritania   | 52         | 69.4      | 4.1                 | 187      | Sichler et al. (1980), T        |
| Liberian dikes                 | 62.4       | 68.5      | 5.3                 | 186      | Dalrymple et                    |

|                                 |       |      |     |     |                              |
|---------------------------------|-------|------|-----|-----|------------------------------|
| and sills                       |       |      |     |     | al. (1975)                   |
| Foum Zguid dike                 | 79.4  | 58.0 | 4.0 | 184 | Hailwood and Mitchell (1971) |
| Draa Valley sills               | 50.5  | 65.5 | 3.5 | 184 | Hailwood and Mitchell (1971) |
| Africa CAMP mean                | 60.4  | 69.7 | 7.9 | 201 | Kent and Irving (2010)       |
| Australia                       |       |      |     |     |                              |
| Tasmanian Dolerite, west dec.   | 174.5 | 50.7 | 5.2 | 183 | Schmidt and McDougall (1977) |
| Garrawilla and Nombi volcanics  | 175.2 | 46.1 | 10  | 180 | Schmidt (1976)               |
| Prospect Dolerite, Sydney basin | 179.5 | 53   | 10  | 168 | Schmidt (1982)               |
| Antarctica                      |       |      |     |     |                              |
| Ferrar Dolerite                 | 223.0 | 51.0 | 2.7 | 183 | Lanza and Zanella 1993       |

Mean paleomagnetic pole for Gondwana in Africa geographic coordinates: N= 21, Lon.= 66.99° E, Lat.= 70.31° S, R= 20.79, A<sub>95</sub>= 3.3°, K= 95.28.

Original articles were reviewed and in some cases the PP's were recalculated considering the assigned ages to their remanences and the available geologic information. For example, data corresponding to different localities of Paganzo basin that would have the same age were averaged and one PP was recalculated.

The same criterion was applied to the directions obtained in the igneous complexes of Mount Leyshon and Tuckers (Clark and Lackie 2003) that correspond to the same magmatic event, based on its geochemistry, paleomagnetic data and age. Also data from Rhyodacites and Ignimbrites Dundee (Lackie 1988) were averaged to obtain only one PP.

Previously unaddressed structural complexities were detected in some cases, leading to the exclusion of some PP's. The PP recently published by Domeier *et al.* (2011), present in Torsvik *et al.* (2012) selection, was excluded in this work, because according to Tomezzoli *et al.* (2013) the applied structural corrections were oversimplified. Similarly data in Vizan (1998), selected by Kent and Irving (2010), were excluded because according to Zaffarana and Somoza (2014) they would not have been fully corrected. Paleomagnetic data from regions that may have been affected by tectonic deformations considered in this work were rigorously analyzed according to the literature and eventually excluded from the final selection.

Unlike Geuna *et al.* (2010), we decided not to combine data in the way suggested by McFadden and McElhinny (1995), and therefore restricted our selection to PP's with 3 or more sampling sites.

Due to the above issues, the volume of data selected in this study is lower than the one used in previous cited works (Clark and Lackie 2003 Geuna *et al.* 2010, Torsvik *et al.* 2012, Kent and Irving 2010).

Even knowing that the factor to correct the magnetic inclinations of clastic sedimentary rocks is variable, the value of 0.6 considered by Torsvik *et al.* (2012) was also used in this paper. Torsvik *et al.* (2012) provided a detailed discussion about the need of this correction citing several cases and considering that the above value is appropriate in accordance with the experimental data and with the statistical model proposed for the geomagnetic field by Tauxe and Kent (2004).

Once completed our data selection, all Gondwana paleomagnetic poles (PP's) were analyzed in present geographic coordinates of Africa, transferred by using the reconstruction parameters of Lawver and Scotese (1987).

The PP's form three clusters according to their age. It is clearly seen for South American poles (Fig. 1 SM), since it is the only continent that has enough PP's for the whole considered time span (from the Early Pennsylvanian till the early Late Jurassic). For South America, each cluster is defined by more than 4 PP's which according to Van der Voo (1990) is a robust data amount to determine the paleogeographic location of a continent for a time-span.

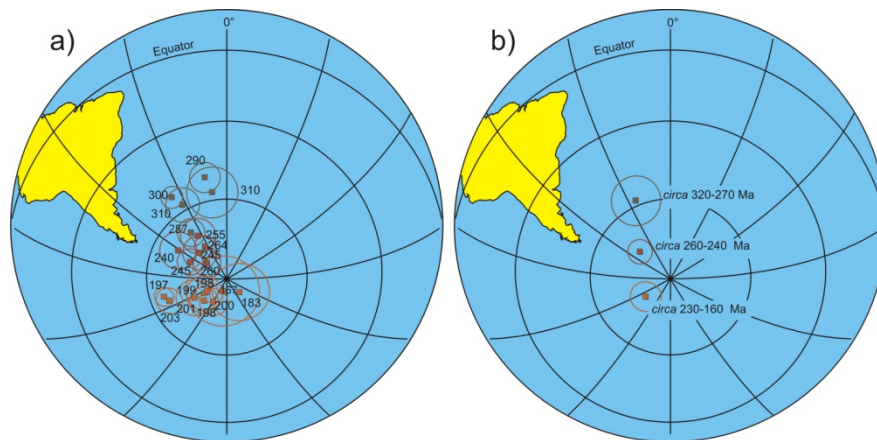

Fig. 1 SM. a) Selected paleomagnetic poles (PP's) for South America for the Early Pennsylvanian-early Late Jurassic time span. Numbers indicate the age of PP's. Note that three groups of poles that correspond to different time intervals can be recognized. b) Mean paleomagnetic poles for South America obtained with the selected PP's. South America geographic coordinates, Schmidt projection.

The three different groups of South America PP's are represented in Fig. 1a SM (supplementary material), corresponding to the following time spans: Early Pennsylvanian-Early Guadalupian (between circa 320 and 270 Ma), Late Guadalupian-Middle Triassic (between circa 260 Ma and 240 Ma), Late Triassic-early Late Jurassic (between circa 230 Ma and 160 Ma). The clustering is clear, though with some dispersion in each of the groups, particularly in the time span extending between the Late Triassic and the early Late Jurassic (PP's selected by Kent and Irving 2010). This dispersion could be attributed to incomplete structural restoration or undetected partial overprints; however, it is considered that the group-averaged mean (Fig. 1b SM), is representative for determining the paleogeographic position of South America.

Based on the clustering of South American poles, we grouped poles from the other Gondwana continents using the same window ages. Then we performed paleogeographic reconstructions using the parameters of Table 2 SM for the three defined time spans.

**Table 2 SM: Reconstruction Parameters (Euler Poles)**

| Euler poles for Early Pennsylvanian-Early Guadalupian time span (to Africa geographic coordinates)  |          |           |           |                                           |
|-----------------------------------------------------------------------------------------------------|----------|-----------|-----------|-------------------------------------------|
| Continent                                                                                           | Lat. (°) | Long. (°) | Angle (°) | Reference                                 |
| South America                                                                                       | 45.5     | -32.2     | 58.2      | Lawver and Scotese (1987)                 |
| Patagonia                                                                                           | 37.25    | 331.72    | 72.37     | This work                                 |
| Australia                                                                                           | -22.67   | -62.34    | 55.23     | Lawver and Scotese (1987)                 |
| Madagascar                                                                                          | -3.41    | -81.7     | 19.73     | Lawver and Scotese (1987)                 |
| India                                                                                               | -27.83   | 223.55    | 66.08     | Lawver y Scotese (1987)                   |
| Antártida                                                                                           | -7.78    | -31.42    | 58        | Lawver and Scotese (1987)                 |
| Arabia                                                                                              | 36.5     | 18.0      | -6.14     | McKenzie and Sclater (1971)               |
| Eurasia                                                                                             | 46.72    | 2.38      | 56.44     | (1)                                       |
| Laurentia                                                                                           | 64.1     | 344.3     | 78.4      | Klitgord and Schouten (1986)              |
| Iberia                                                                                              | 50.51    | 10.68     | 10.68     | (2)                                       |
| Euler poles for Late Permian-Middle Triassic time span (to Northwest Africa geographic coordinates) |          |           |           |                                           |
| South America                                                                                       | 55.1     | -35.7     | 50.9      | Rabinowitz and La Breque 1979, anomaly 34 |
| Central Africa (Congo Craton)                                                                       | 19       | 2         | -2        | Pindell and Dewey (1982) (3)              |
| South Africa (Kalahari Craton)                                                                      | 27.24    | 0.4       | -8        | This work (4)                             |
| Madagascar                                                                                          | 9.9      | 76.17     | -14.56    | This work (4)                             |
| Arabia                                                                                              | -32.24   | 193.85    | 8.02      | This work (4)                             |
| India                                                                                               | 16.9     | 34.07     | -84.45    | This work (4)                             |
| Antarctica                                                                                          | 6.57     | 128.33    | -38.91    | This work (4)                             |



|                                                                                                          |        |        |        |                                 |
|----------------------------------------------------------------------------------------------------------|--------|--------|--------|---------------------------------|
| Australia                                                                                                | 16.4   | 88.83  | -49.75 | This work (4)                   |
| Laurentia                                                                                                | 73.18  | -6.75  | 74.07  | This work                       |
| Eurasia                                                                                                  | 56.8   | 10.59  | 48.64  | This work                       |
| Iberia                                                                                                   | 27.48  | 179.38 | 9.83   | This work                       |
| Euler poles for Late Triassic-early Late Jurassic time span (to Northwest Africa geographic coordinates) |        |        |        |                                 |
| South America                                                                                            | 52.6   | -33.2  | 50.6   | Unterneher et al. (1988)        |
| Central Africa<br>(Congo Craton)                                                                         | 19     | 2      | -7     | Pindell and Dewey (1982)        |
| South Africa<br>(Kalahari Craton)                                                                        | 19     | 2      | -7     | Pindell and Dewey (1982)        |
| Madagascar                                                                                               | 13.46  | 101.17 | -11.14 | (5)                             |
| India                                                                                                    | -24.73 | 218.08 | 64.52  | (5)                             |
| Australia                                                                                                | -21.31 | -71.12 | 52.33  | (6)                             |
| Antarctica                                                                                               | -7.57  | -36.35 | 51.37  | (6)                             |
| Arabia                                                                                                   | 27     | 9.38   | -12.9  | (7)                             |
| Iberia                                                                                                   | 48.99  | 12.23  | 6.16   | (2)                             |
| Laurentia                                                                                                | 67     | 348    | 75.6   | Klitgord and Schouten<br>(1986) |
| Eurasia                                                                                                  | 49.23  | 5.705  | 52.56  | (1)                             |
| Euler poles for absolute reconstructions of Gondwana (Africa)                                            |        |        |        |                                 |
| <i>ca.</i> 320 – 270 Ma                                                                                  | 0      | 144.4  | 63     | This work                       |
| <i>ca.</i> 260 – 240 Ma                                                                                  | 0      | 146.2  | 31.8   | This work                       |
| <i>ca.</i> 230 – 160 Ma                                                                                  | 0      | 157.0  | 19.69  | This work                       |

North (South) latitude: positive (negative). East (West) longitude: positive (negative). Negative (positive) rotation angle : clockwise (counterclockwise). (1) Calculated adding the Euler pole of Alvey (2009) with those of Klitgord and Schouten (1986). (2) Calculated adding the Euler poles of Rosenbaum *et al.* (2002), Alvey (2009) and Klitgord and Schouten (1986). (3) Considering just 2° of clockwise rotation instead of 8° in the same sense. (4) Calculated adding to the Euler poles used in Late Carboniferous-Middle Permian reconstructions, a rotation around the centers of the arcs of circumferences where intra-plate deformations are suspected (19° N 2°E; 30°N 0°; 7°N 3°O). (5) Calculated adding to the Euler poles of Smith and Hallam (1970) a further rotation about: 7°N, 3°W, 8° (clockwise). (6) Calculated adding to the Euler poles of Lawver and Scotese (1987) a further rotation about: 7°N, 3°W, 8° (clockwise).

Once poles were transferred to Africa present geographic coordinates, we observed if there were systematic differences between clusters from the different continents forming Gondwana, in each of the three periods. We decided to ascribe these differences to tectonic processes involving movements of lithospheric domains through the considered arches of deformation.

By using reconstruction parameters whose centers are located in northwest Africa, lithospheric domains were displaced to achieve common means between paleomagnetic poles of different continents. It is noteworthy that only in one case a common mean between PP's of two continents was not achieved at 95%, though it did at 99% confidence (Table 3 SM). It was considered, therefore, that each paleogeographic reconstruction of Gondwana was valid if they were geologically plausible and the PP's populations of the involved continents shared a common mean.

**Table 3 SM: Statistical tests for common means applied to PP's on pairs of Gondwana plates.**

Early Pennsylvanian-Early Guadalupian time span

| Continent(s) | K?    | $\gamma$ | $\gamma_c$ | Prob. | f    | F (95) | F (99) |
|--------------|-------|----------|------------|-------|------|--------|--------|
| SAM + AUS    | 0.183 | 10.9     | 12.0       | 0.093 | 5.17 | 6.271  | 11.052 |
| AF + AUS     | 0.02  | 4.1      | 11.1       | 0.598 | 1.05 | 7.469  | 12.871 |
| SAM + AF     | 0.219 | 6.9      | 10.0       | 0.202 | 3.73 | 7.902  | 15.936 |

SAM: South America (N 5, K 69.14, R 4.94); AF: Africa (N 10, K 104.51, R 9.91); AUS: Australia (N 7, K 36.21, R 6.83).

Late Guadalupian – Middle Triassic time span

| Continent(s) | K?    | $\gamma$ | $\gamma_c$ | Prob. | f     | F (95) | F (99) |
|--------------|-------|----------|------------|-------|-------|--------|--------|
| SAM + AUS    | 0.067 | 13.0     | 10.4       | 0.014 | 12.28 | 7.772  | 14.36  |
| SAM + IND    | 0.086 | 5.1      | 10.6       | 0.367 | 2.03  | 8.815  | 17.136 |
| SAM + AF/MAD | 0.284 | 2.1      | 9.4        | 0.791 | 0.43  | 8.663  | 19.046 |
| SAM + AF     | 0.034 | 4.2      | 4.8        | 0.101 | 6.24  | 7.965  | 13.625 |
| AUS + AF/MAD | 0.266 | 11.4     | 12.6       | 0.079 | 6.92  | 8.503  | 14.231 |
| AUS + AF     | 0.012 | 9.6      | 11.1       | 0.086 | 8.06  | 10.693 | 21.578 |
| AUS + IND    | 0.454 | 11.5     | 12.7       | 0.087 | 6.21  | 7.531  | 12.007 |
| AF/MAD + IND | 0.298 | 5.7      | 12.3       | 0.417 | 1.85  | 8.521  | 17.837 |
| AF + IND     | 0.013 | 2.7      | 10.6       | 0.718 | 0.67  | 10.816 | 24.188 |

SAM: South America (N 6, K 230.65, R 5.98); AF/MAD: Africa + Madagascar (N 3, K 103.03, R 2.98); IND: India (N 4, K 82.22, R 3.96); AUS: Australia (N 4, K 74.04, R 3.97)

Late Triassic – early Late Jurassic time span

| Continent(s) | K?    | $\gamma$ | $\gamma_c$ | Prob. | f    | F (95) | F (99) |
|--------------|-------|----------|------------|-------|------|--------|--------|
| AUS + SAM    | 0.06  | 4.9      | 7.0        | 0.225 | 3.37 | 7.048  | 11.896 |
| AUS + AF/ANT | 0.061 | 5.5      | 7.3        | 0.145 | 4.27 | 7.5    | 12.591 |
| AUS + AF     | 0.056 | 5.1      | 7.3        | 0.226 | 3.28 | 6.863  | 10.157 |
| SAM + AF/ANT | 0.494 | 0.9      | 7.6        | 0.946 | 0.1  | 6.43   | 11.249 |
| SAM + AF     | 0.459 | 1.4      | 8.1        | 0.912 | 0.2  | 6.715  | 10.813 |

SAM: South America (N 9, K 82.07, R 8.90); AF: Africa (N 8, K 78.21, R 7.91); AUS: Australia (N 3, K 430.47, R 2.99)

K?: Probability of obtaining a test value greater than the observed, under the null hypothesis of common K.  $\gamma$ : angle between means.  $\gamma_c$ : critical angle. Prob.: Probability of exceeding the critical angle under the null hypothesis of a common mean. f: value for the statistical test of McFadden and Lowes (1981) calculated assuming Fisher distribution (Fisher 1953) and performing simulation as defined by McFadden (1990). F (95), F (99), critical values for the F test at 95% and 99% confidence, respectively. Italics were used for rejected null hypotheses at 95% confidence.

***Paleomagnetic poles corresponding to the three selected periods analyzed in present Africa geographical coordinates***

Early Pennsylvanian-Early Guadalupian (circa 320 Ma-270 Ma)

For this time 5 PP's from South America (excluding Southern Patagonia, Table 1 SM), 10 from Africa and 7 from Australia were selected, thus leaving Australia as the only East Gondwana plate with valid paleomagnetic data in this period.

The poles were rotated by using the classical reconstruction parameters of Lawver and Scotese (1987). A good fit was obtained, as shown by positive statistical tests of common means between poles of each pair of plates (South America vs. Africa, South America vs. Australia, Africa vs. Australia, see Fig.2 SM and Table 3 SM). No additional rotations were required for these plates to improve their fit in this time span.

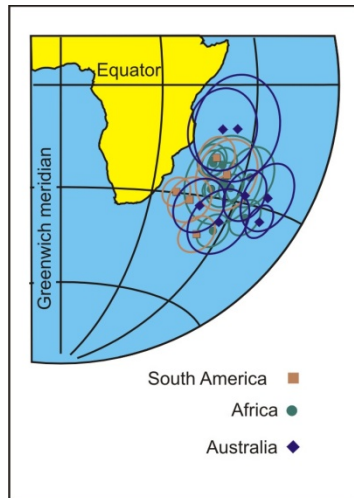

Fig. 2 SM. Selected PP's of Gondwana for the time interval Early Pennsylvanian-Early Guadalupian (ca. 320 Ma – 270 Ma), reconstructed to Africa geographic coordinates. Schmidt projection.

The situation is different for the domain "Southern Patagonia" (to the south of Gastre Fault System); its position is only constrained by one paleomagnetic pole corresponding to Tepuel Group (Westfalian-Namurian). It was based on 16 sites in two distant locations (separated by about 60 km) and it passed a tilt test (Rapalini *et al.* 1994). Both localities are to the S-SW of Chubut river, relatively close, but outside the Gastre Fault System belt. Tepuel PP is not in agreement with the rest of Gondwana poles when rotated according to Lawver and Scotese (1987), and it could only be approximated to them by applying a rotation to Southern Patagonia, around an Euler pole at 37.25°N and 331.72° E (Table 2 SM). The approach is not perfect (see Fig. 3a SM), as a significant difference persists which cannot be accounted for by rotations in the sense proposed in this study. However, Tepuel PP reconstructed and rotated becomes coincident (Fig. 4b SM) with 3 Westfalian-Namurian Laurentia poles (ages 320, 317 and 303 Ma in Torsvik *et al.* 2012), transferred to Africa present geographic coordinates by using the Euler pole of Klitgord and Schouten (1986). We interpret that the discrepancy between poles from Southern Patagonia and West Gondwana records subsequent relative movements between them (see next section), while coincidence between Southern Patagonia and the most rigid Laurentia PP's reflects their links through global plate circuits. Notice that Laurentia is considered a rigid plate from the Precambrian Rodinia supercontinent. While further rotation imposed to Southern Patagonia increases the value of the precision parameter Kappa (Fisher 1953) for Laurentia + Tepuel poles by 50%, it is clear that the statistics are based on a poor database, and more data are needed to unravel the complex tectonic history for Patagonia during the Paleozoic.

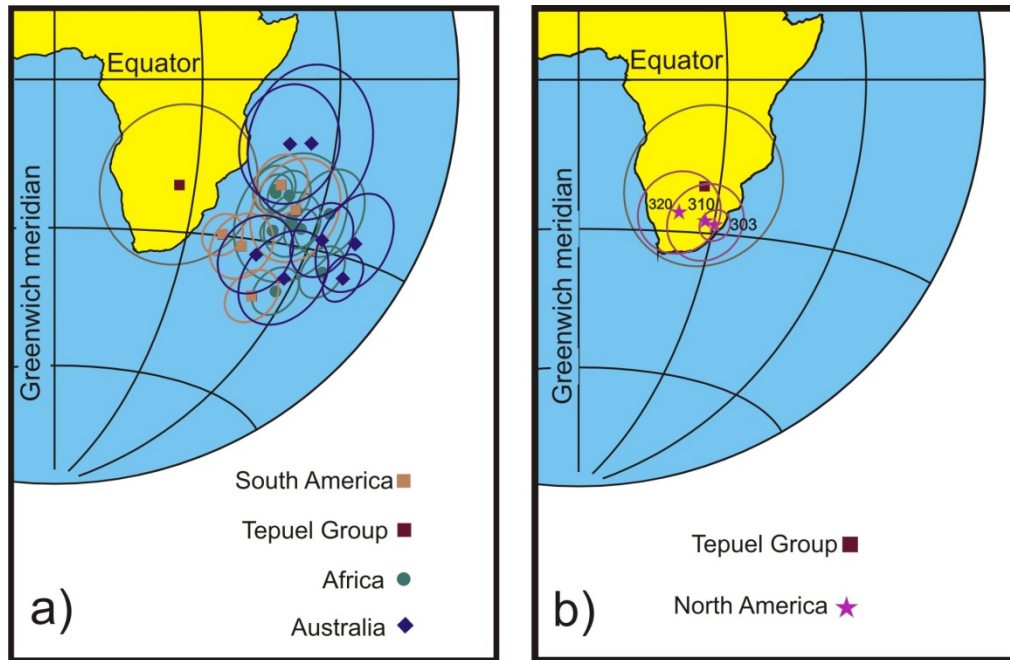

Fig. 3 SM. a) Comparison of the PP of Tepuel Group with those selected of South America for the Early Pennsylvanian-Early Guadalupian (Africa geographic coordinates). b) Comparison of the PP of Tepuel Group with three PP's of Laurentia with similar ages (all PP's were reconstructed to Africa geographic coordinates).

#### Late Guadalupian – Middle Triassic (circa 260 Ma – 240 Ma)

For this time span 6 PP's from South America (Table 1 SM), 2 from Africa, 1 from Madagascar, 4 from India and 4 from Australia were selected.

The reconstruction to Africa present geographical coordinates by using the Lawver and Scotese (1987) parameters leaves data much more dispersed than for the previous period (compare Figs. 2 and 4a SM). There is a remarkable difference between the East Gondwana (Australia and India) and South American poles (Fig. 4a SM). This difference arising when using classical reconstructions, has already been observed by different authors (Klootwijk 1979, Irving and Irving 1982, Oviedo and Vilas 1984, Rapalini and Vizán 1993).

Our proposal to consider the plates as non-rigid and composed by different domains separated by belts of focused deformation, was used to achieve a better fit between the selected PP's from different continents. Northwest Africa was regarded as a "fixed" domain as the centers of the arcs of the deformation belts considered in this work are located there. The PP's were transferred to this domain by using the reconstruction parameters of Table 2 SM, constructed as follows: Data from South America were brought to Africa present geographic coordinates using the parameter of reconstruction for the anomaly 34 of Rabinowitz and LaBrecque (1979). This makes a very good fit between the northern coast of South America and the southern margin of northwest Africa, leaving an open space between the southern coasts. This space allowed moving westward the Congo and Kalahari cratons, and consequently East Gondwana continents were also able to be moved westwards. The Euler pole used to move the Congo craton with respect to Northwest Africa was proposed by Pindell and Dewey (1982); it displaces Congo along an arc located in its northern boundary, which would later become the Benue trough. We added an extra movement to the Kalahari craton, along the arc containing also the Guapiara-Curitiba fault-zone (South America), the Damara mobile belt (Africa) and, across the Paleotethys ocean, the trace of the Ural Mountains. A similar movement was applied to the island of Madagascar.

East Gondwana continents, were further rotated around an Euler pole whose center corresponds to that of the arc containing the Gastre Fault System (Patagonia) and the boundary between East and West Gondwana.

The Euler poles constructed by combining classical reconstructions with additional rotations around deformation belts (Table 2 SM) allowed a better fit of Gondwana PP's (Fig. 4b). The PP of Madagascar approaches the two South Africa PP's, and all of them are much closer to those of South America. Moreover, the PP's of Australia and India are located closer to West Gondwana data (*cf* Fig.4a SM and Fig.4b SM).

Statistical tests of common means between poles of each pair of plates were performed, with the only pole from Madagascar assumed to constitute an only population with African poles. Only South America + Australia failed the test of common mean at 95% of confidence, while they passed it at 99% (Table 3 SM). This particular failure could reflect the peculiar distribution of Australian poles which are poorly grouped for this period. However, in general terms pole fitting significantly improved by considering focused internal deformation within plates.

It should be noticed that our best fit was obtained by considering internal movements within Africa. Possible movements in South America cannot be excluded and are discussed in the main text. However, the statistical best fit could be considered as evidence for internal movements in the African plate being more significant.

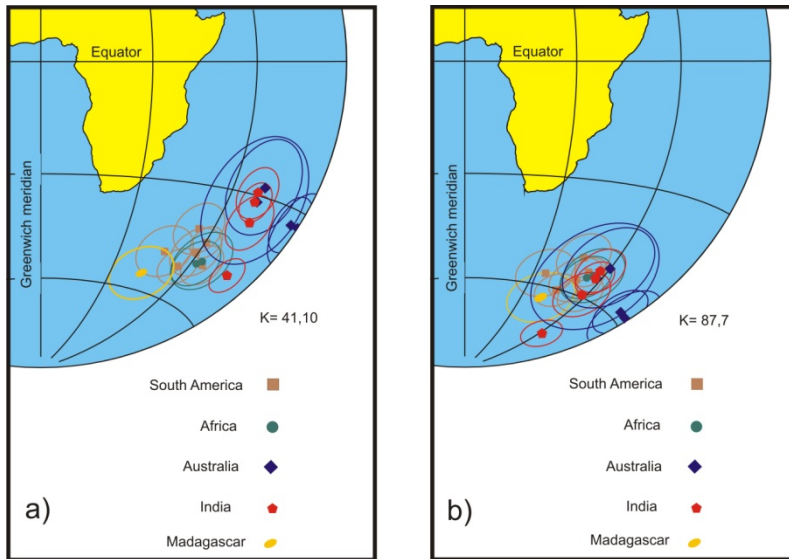

Fig. 4 SM. a) Paleomagnetic poles of Gondwana for the Late Guadalupian-Middle Triassic in Africa geographic coordinates using Lawver and Scotese (1987) reconstruction parameters. b) The same PP's considering internal deformation of continents (domains rotated by using as Euler poles the centers of arches located in northwest Africa, see Table 2 SM). Note that there is a better grouping of poles of the different continents.

#### Late Triassic – early Late Jurassic (circa 230 Ma – 160 Ma)

For this time span we followed the selection performed by Kent and Irving (2010), with the only exception of the pole of Vizán (1998) as mentioned previously. Then the selection is composed by 9 PP's of South America, 8 of Africa, 3 of Australia and 1 of Antarctica.

The reconstruction parameter of Unterneher et al. (1988), which achieves the best fit between the coastlines of northern Brazil and West Africa and considers the flow lines inferred through Walvis Ridge, was used for reassembling West Gondwana (South America and Africa). To select this model, it was taken into account that the configuration of West Gondwana should be consistent with features that would result in both plates during the extensional processes that ultimately would determine the opening of the Atlantic Ocean.

This Euler pole differs little from the one proposed by Rabinowitz and LaBreque (1979) for the anomaly 34 reconstruction that we used in the previous period.

To achieve a good fit between the southern margins of South America and Africa, Congo and Kalahari were rotated around a common Euler pole located at 19° N, 2° E (present geographic coordinates of Africa).

To make the reconstruction of Madagascar to present geographic coordinates of Africa the parameter of Smith and Hallam (1970) was used. This reconstruction is consistent with the extensional tectonics that would have happened in the Morondava basin located between Madagascar and Africa (Schandelmeyer et al., 2004). Also considering the extensional processes between the east coast of Madagascar and India during this time span (Plummer and Belle 1995), the reconstruction parameter of Smith and Hallam (1970) was used for India.

Antarctica and Australia were reconstructed to Africa geographical coordinates by using the Euler poles of Lawver and Scotese (1987), plus the rotation imposed (see above) to Congo and Kalahari about 7° N and 3° W (in present geographic coordinates of Africa).

When pole grouping is statistically tested by pairs of plates between Australia, Africa and South America, it supports the hypothesis of a common mean at 95% confidence in every case (Table 3 SM, see also Fig. 5). The same is true if the only pole selected for Antarctica is taken together with the Australian poles, and the whole group tested against Africa or South America.

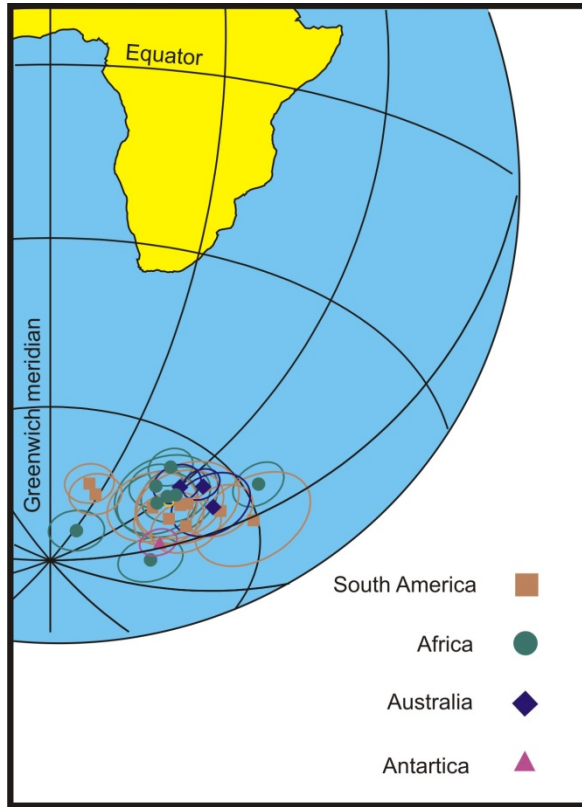

Fig. 5 SM: Paleomagnetic poles of Gondwana continents for the Late Triassic-early Late Jurassic in Africa geographic coordinates (using the reconstruction parameters of Table 2 SM).

### ***Checking the obtained Gondwana reconstructions with models of Wegener - type Pangea***

Since the mid-70s until today there has been a scientific debate as to the configuration of Pangea between Late Paleozoic and Early Mesozoic (see Aubele *et al.* 2012). According to Domeier *et al.* (2012a) it would be similar to that proposed by Wegener, also the one with more geological arguments (*e.g.* Hallam 1982, Weil *et al.* 2001, Pastor Galan 2012).

In order to check if our obtained Gondwana reconstructions were consistent with models of Wegener-type Pangea, Laurasia PP's from Domeier *et al.* (2012a)'s list for the first two periods, and from Kent and Irving (2010)'s list for the third, were selected (Table 4 SM).

**Table 4 SM: Paleomagnetic poles of Laurasia to check Wegener's Type Pangea**

Selected Paleomagnetic poles for the mean of the Early Pennsylvanian-Early Guadalupian time span (ca 320 Ma – 270 Ma), from the list of Torsvik et al. (2012)

| Locality or Stratigraphic unit                 | Lon. (° E) | Lat. (°S) | A <sub>95</sub> (°) | Age (Ma) | References             |
|------------------------------------------------|------------|-----------|---------------------|----------|------------------------|
| Stable Europe                                  |            |           |                     |          |                        |
| Tashkovska Donbas Ukraine                      | 341.5      | 40.3      | 2.9                 | 312      | Meijers et al. (2010)  |
| Westphalian-Stephanian red beds Czech Rep.     | 343.0      | 38.0      | 9.0                 | 305      | GPDB 167, T            |
| Queensferry sill, Scotland                     | 354.0      | 38.3      | 5.2                 | 305      | GPDB 2447, T           |
| Wakerfield dyke, England                       | 349.0      | 49.0      | 3.0                 | 303      | GPDB 180, T            |
| Debaltsevo Donbas, Ukraine                     | 342.3      | 48.2      | 2.0                 | 303      | Meijeres et al. (2010) |
| Donets basin, Ukraine                          | 337.3      | 49.9      | 3.0                 | 301      | Iosifidi et al. (2010) |
| Peterhead dyke, Scotland                       | 342.0      | 41.0      | 1.3                 | 297      | GPDB 1535, T           |
| Ny-Hellesund sills, Norway                     | 341.0      | 39.0      | 2.9                 | 297      | GPDB 626, T            |
| Arendal diabase dykes, Norway                  | 339.6      | 42.5      | 7.1                 | 297      | GPDB 175, T            |
| Silesia volcanic, Poland                       | 354.0      | 43.0      | 13.6                | 296      | GPDB 465, T            |
| Thuringer forest volcanic, Germany             | 350.0      | 37.1      | 7.1                 | 295      | GPDB 1792, T           |
| Scania dolerites, Sweden                       | 354.0      | 37.0      | 11.0                | 294      | GPDB 2211              |
| Scania dolerites, Sweden                       | 348.0      | 38.0      | 6.5                 | 294      | GPDB 2222, T           |
| Alnwick Sill, High Green and St. Oswald Chapel | 337.1      | 47.1      | 8.1                 | 294      | Liss et al. (2004), T  |



|                                                |       |      |      |     |                            |
|------------------------------------------------|-------|------|------|-----|----------------------------|
| Dyke, UK                                       |       |      |      |     |                            |
| Cracow volcanic A, Poland                      | 355.0 | 44.0 | 4.8  | 294 | Nawrocki et al. (2008), T  |
| Lower Nideck volcanic, France                  | 348.0 | 47.0 | 4.0  | 294 | GPDB 174, T                |
| Holy Island Sill and Dyke, UK                  | 346.8 | 35.4 | 6.3  | 294 | Liss et al. (2004)         |
| Hadrian's Wall-Pennines Sill and Hett Dyke, UK | 347.1 | 32.9 | 3.5  | 294 | Liss et al. (2004)         |
| Great Whin Sill, UK                            | 339.0 | 44.0 | 4.8  | 294 | GPDB 585, T                |
| Sudetic Mountain granitoids, Poland            | 346.0 | 42.0 | 13.0 | 293 | GPDB 2446, T               |
| Nahe volcanic, Germany                         | 347.0 | 46.0 | 13.0 | 291 | GPDB 940, T                |
| Stabben Sill, Norway                           | 354.0 | 32.0 | 2.4  | 291 | GPDB 1540, T               |
| Thuringer Forest sediments, Germany            | 338.1 | 45.3 | 5.8  | 287 | GPDB 1792, T               |
| Black Forest rhyolites, Germany                | 353.0 | 42.0 | 1.0  | 286 | GPDB 2941, Recalculated, T |
| Exeter Lavas, UK                               | 343.0 | 48.0 | 10.0 | 286 | GPDB 411, Recalculated, T  |
| Black Forest volcanics, Germany                | 356.0 | 49.0 | 5.9  | 286 | GPDB 170, T                |
| Exeter Lavas, UK                               | 330.0 | 50.0 | 4.0  | 286 | GPDB 461, T                |
| Lower Silesia volcanics, Poland                | 352.0 | 40.0 | 13.2 | 285 | GPDB 465, Recalculated, T  |
| Bohemian Red Beds, Czech Rep.                  | 343.5 | 44.0 | 4.0  | 285 | GPDB 167, T                |
| Intrasudetic basin sediments, Poland           | 339.4 | 38.5 | 6.8  | 285 | GPDB 3161, T               |

|                                            |       |      |      |     |                       |
|--------------------------------------------|-------|------|------|-----|-----------------------|
| Krakov volcanics                           | 345.0 | 43.0 | 7.9  | 285 | GPDB 275, T           |
| Lodeve Basin,<br>France                    | 350.2 | 40.5 | 2.0  | 285 | GPDB 1813, T          |
| NorthSudeticBasin                          | 354.0 | 42.0 | 8.1  | 285 | GPDB 3161, T          |
| Mount Hunneberg<br>Sill, Sweden            | 346.0 | 38.0 | 6.3  | 285 | GPDB 2211, T          |
| Lower Lodeve<br>snadstone                  | 350.6 | 39.8 | 7.7  | 285 | GPDB 2211, T          |
| KrkonošeBasin oil<br>Shales, Czech<br>Rep. | 345.2 | 42.4 | 2.0  | 285 | GPDB 2444, T          |
| NorthSudeticBasin<br>sediments, Poland     | 4.1   | 48.6 | 5.1  | 285 | GPDB 3161, T          |
| IntrasudeticBasin<br>volcanic, Poland      | 352.0 | 43.0 | 3.2  | 285 | GPDB 3161, T          |
| Moissey volcanic,<br>France                | 352.0 | 41.0 | 6.7  | 285 | GPDB 1205, T          |
| Trachytes,<br>Ukraine                      | 359.7 | 49.4 | 6.5  | 283 | Yuan et al.<br>(2011) |
| Sarna alkaline<br>intrusion, Sweden        | 346.0 | 38.0 | 6.9  | 281 | GPDB 1735, T          |
| Ringerike lavas,<br>Norway                 | 337.0 | 44.6 | 13.4 | 281 | GPDB 1830, T          |
| Oslo volcanics,<br>Norway                  | 337.0 | 41.0 | 7.0  | 281 | GPDB 915, T           |
| Bohemian Massif<br>igneous, Germany        | 346.0 | 42.0 | 7.0  | 280 | GPDB 2356, T          |
| Mauchline lavas,<br>Scotland               | 337.0 | 47.0 | 14.0 | 280 | GPDB 3093, T          |
| Bohemian quartz<br>porphyry,<br>Germany    | 341.0 | 37.0 | 10.0 | 280 | GPDB 3145, T          |
| Scania melaphyre<br>dykes, Sweden          | 352.0 | 54.0 | 11   | 279 | GPDB 2222, T          |
| Bohuslän dykes<br>combined, Sweden         | 345.0 | 51.0 | 8.6  | 275 | GPDB 1155, T          |

| North America                 |       |      |      |     |                               |
|-------------------------------|-------|------|------|-----|-------------------------------|
| Mauch Chunk                   | 294.4 | 22.6 | 8.3  | 320 | Bilardello and Kodama (2010a) |
| Shepody Fm,<br>Nova Scotia    | 298.3 | 27.2 | 7.7  | 317 | Bilardello and Kodama (2010b) |
| Riversdale Group              | 301.5 | 30.2 | 6.0  | 310 | GPDB 1110, T                  |
| Glenshaw Fm                   | 299.8 | 28.7 | 3.1  | 303 | Kodama (2009)                 |
| Lower Casper Fm               | 314.6 | 50.5 | 1.8  | 303 | GPDB 1455, T                  |
| Wescogame Fm                  | 306.8 | 46.3 | 3.4  | 301 | GPDB 1311, T                  |
| Laborcita Fm                  | 313.4 | 43.0 | 2.1  | 301 | GPDB 1311, T                  |
| Dunkard Fm                    | 300.4 | 41.5 | 3.9  | 300 | GPDB 302, T                   |
| Upper Maroon Fm               | 285.1 | 60.6 | 12.8 | 299 | GPDB 504, T                   |
| Minturn and<br>Maroon Fms     | 300.8 | 40.3 | 2.8  | 298 | GPDB 1685, T                  |
| Cutler Fm                     | 301.5 | 42.6 | 2.0  | 292 | GPDB 671, T                   |
| Ingelside Fm                  | 311.7 | 46.5 | 2.0  | 292 | GPDB 1142, T                  |
| Cutler Fm,<br>LisbonValley    | 310.1 | 42.1 | 7.1  | 292 | GPDB 1341, T                  |
| ElephantCanyon<br>Fm          | 295.2 | 35.8 | 5.0  | 292 | GPDB 671, T                   |
| Upper Casper Fm               | 310.3 | 56.2 | 1.5  | 291 | GPDB 1455, T                  |
| Piedmont Mafic<br>intrusions  | 300.8 | 38.9 | 10.2 | 289 | GPDB 1527, T                  |
| Abo Fm                        | 305.9 | 48.3 | 2.1  | 285 | GPDB 1311, T                  |
| Fountain and<br>Lykins Fms    | 308.8 | 47.8 | 13.1 | 283 | GPDB 504, T                   |
| Artinskian Pictou<br>red beds | 306.4 | 41.4 | 3.6  | 280 | GPDB 2281, T                  |
| Leonardian subset             | 304.0 | 53.7 | 5.0  | 277 | GPDB 688, T                   |

Mean Paleomagnetic pole for Laurasia in North America geographic coordinates: N= 68, Lon.= 316.31°E, Lat.= 43.66° S, R= 66.91, A<sub>95</sub>= 2.2°, K= 61.69. In Africa geographic coordinates: Lon.= 52.98° E, Lat.= 32.0° S.

Selected Paleomagnetic poles for the mean of the Late Guadalupian – Middle Triassic time span (ca 320 Ma – 270 Ma), from the list of Torsvik et al. (2012)

| Locality or Stratigraphic unit                | Lon. (° E) | Lat. (°S) | A <sub>95</sub> (°) | Age (Ma) | References               |
|-----------------------------------------------|------------|-----------|---------------------|----------|--------------------------|
| Stable Europe                                 |            |           |                     |          |                          |
| Esterel sediments, France                     | 327.7      | 50.6      | 5                   | 264      | GPDB 165, T              |
| Permian red beds , Lodeve, France             | 326.4      | 58.6      | 0.0                 | 264      | GPDB 1207, T             |
| BriveBasin sediments, France                  | 341.7      | 52.6      | 4.0                 | 261      | GPDB 3144, T             |
| Late Permian sediments, Urals                 | 338.2      | 54.9      | 3.5                 | 260      | Bazhenov et al. (2008)   |
| Massif des Maures, France                     | 338.1      | 55.4      | 4.0                 | 255      | GPDB 1408,T              |
| Dome de Barrot red beds, France               | 324.7      | 50.0      | 2.7                 | 255      | GPDB 652, T              |
| Siberian traps mean                           | 334.4      | 52.8      | 9.7                 | 251      | Pavlov et al. (2007)     |
| Moyero River Siberian Traps, Siberia          | 314.5      | 58.5      | 2.7                 | 251      | Gallet and Pavlov (1996) |
| Big Nirundaiver intrusión, sedimenta, Siberia | 323.0      | 54.3      | 5.0                 | 251      | Pavlov et al. (2007)     |
| Stolbovaya River Siberian Traps, Siberia      | 330.3      | 53.3      | 5.3                 | 251      | Pavlov et al. (2007)     |
| Sudetes sediments, Poland                     | 336.5      | 59.3      | 5.0                 | 251      | GPDB 3161, T             |
| KotuyRiver Siberian Traps, Siberia            | 328.4      | 52.7      | 13.9                | 251      | Pavlov et al. (2007)     |
| Taimyr Siberian Traps, Siberia                | 330.0      | 59.0      | 10                  | 250      | GPDB 2832, T             |
| German Trias,                                 | 341.0      | 58.8      | 3.3                 | 249      | Szurlies et al.          |

|                                  |       |      |      |     |                          |
|----------------------------------|-------|------|------|-----|--------------------------|
| Lower Buntstein                  |       |      |      |     | (2003)                   |
| Taimyr basalts,<br>Siberia       | 325.8 | 59.3 | 7.8  | 248 | Walderhaug et al. (2005) |
| Volpriehausen Fm, Germany        | 344.7 | 57.0 | 3.8  | 246 | Szurlies (2004)          |
| Upper Buntsandstein, France      | 322.2 | 47.8 | 5.0  | 243 | GPDB 1028, T             |
| Bunter and Musschelkalk, Germany | 318.6 | 56.5 | 15.0 | 239 | GPDB 158, T              |
| North America                    |       |      |      |     |                          |
| Guadalupian red beds             | 311.6 | 54.8 | 5.0  | 263 | GPDB 688, T              |
| Ochoan red beds                  | 302.2 | 57.3 | 15.0 | 258 | GPDB 688, T              |
| Bernal Fm                        | 300.0 | 51.6 | 8.0  | 255 | GPDB 2489, T             |
| DeweyLakeFm                      | 310.3 | 51.6 | 5.0  | 250 | GPDB 2303, T             |
| Lower Fundy Group                | 271.1 | 45.5 | 7.2  | 248 | Symons et al. (1989)     |
| LowerRedPeak Fm                  | 306.1 | 50.5 | 7.0  | 235 | GPDB 1134, T             |

Mean paleomagnetic pole for Laurasia in North America geographic coordinates: N= 24, Lon.= 305.93° E, Lat.= 56.61° S, R= 23.8, A<sub>95</sub>= 2.8°, K= 113.26. In Africa geographic coordinates: Lon.= 47.90° E, Lat.= 55.27° S.

Selected Paleomagnetic poles for the mean of the Late Triassic – early Late Jurassic time span (ca 320 Ma – 270 Ma), from the list of Kent and Irving (2010)

| Locality or Stratigraphic unit   | Lon. (° E) | Lat. (°S) | A <sub>95</sub> (°) | Age (Ma) | References                  |
|----------------------------------|------------|-----------|---------------------|----------|-----------------------------|
| Stable Eurasia                   |            |           |                     |          |                             |
| Rochechouart impact, France      | 294.9      | 54.6      | 5.2                 | 214      | Carporzen and Gilder (2006) |
| Kerforne dykes, Brittany, France | 259.0      | 61.0      | 7.5                 | 198      | Sichler and Perrin (1993)   |
| Scania Basalts, Sweden           | 283.0      | 69        | 6.8                 | 179      | Bylund and Halvorsen        |

|                           |       |      |     |     |                                                                             |
|---------------------------|-------|------|-----|-----|-----------------------------------------------------------------------------|
|                           |       |      |     |     | (1993)                                                                      |
| North America             |       |      |     |     |                                                                             |
| Princeton NBCP core       | 286.6 | 54.2 | 2.0 | 227 | Kent and Olsen (1999) and Kent and Tauxe (2005)                             |
| Dan River basin sediments | 279.8 | 58.5 | 1.1 | 221 | Kent and Olsen (1997) and Kent and Tauxe (2005)                             |
| Nursery Road NBCP core    | 281.6 | 60.5 | 2.5 | 221 | Kent and Olsen (1999) and Kent and Tauxe (2005)                             |
| Titusville NBCP core      | 279.5 | 59.9 | 1.7 | 217 | Kent and Olsen (1999) and Kent and Tauxe (2005)                             |
| Manicouagan melt rocks    | 269.9 | 58.8 | 5.8 | 215 | Larochelle and Curie (1967), Robertson (1967) and Hodych and Dunning (1992) |
| Rutgers NBCP core         | 277.1 | 60.1 | 1.4 | 214 | Kent and Olsen (1999) and Kent and Tauxe (2005)                             |
| Somerset NBCP core        | 275.3 | 61.7 | 2.0 | 211 | Kent and Olsen (1999) and Kent and Tauxe (2005)                             |
| Weston NBCP core          | 266.5 | 66.6 | 2.9 | 207 | Kent and Olsen (1999) and Kent and Tauxe (2005)                             |

|                             |       |      |     |     |                                                      |
|-----------------------------|-------|------|-----|-----|------------------------------------------------------|
| Martinsville NBCP core      | 276.1 | 67.8 | 2.9 | 204 | Kent and Olsen (1999) and Kent and Tauxe (2005)      |
| Newark + Hartford volcanics | 277.3 | 66.3 | 5.0 | 201 | Prévot and McWilliams (1989) and Hames et al. (2000) |
| Hartford basin sediments    | 268.2 | 66.6 | 2.3 | 200 | Kent and Olsen (2008)                                |
| WhiteMt. plutons            | 304.5 | 85.5 | 5.2 | 180 | Opdyke and Wensink (1966)                            |
| Moat volcanics              | 269.7 | 81.6 | 5.6 | 169 | Van Fossen and Kent (1990)                           |

Mean paleomagnetic pole for Laurasia in North America geographic coordinates:  $N=16$ ,  $Lon.=272.82^{\circ}$  E,  $Lat.=66.17^{\circ}$  S,  $R=15.76$ ,  $A_{95}=4.7^{\circ}$ ,  $K=62.2$ . In Africa geographic coordinates:  $Lon.=55.89^{\circ}$  E,  $Lat.=68.39^{\circ}$  S.

The poles from Europe and Asia were transferred to North American coordinates by using reconstruction parameters of Alvey (2009), and then averaged with Laurentian PP's. The three poles obtained in this way, one for each time span, were compared with Gondwana poles after reconstructing them to African coordinates with Klitgord and Schouten (1986) rotation poles. For the Late Guadalupian-Middle Triassic span, a slight modification was introduced to Klitgord and Schouten (1986) pole (see Table 2 SM), which improved the paleomagnetic fit while still being geologically akin.

Fig. 6 SM shows that the obtained Wegener- type models of Pangea are paleomagnetically possible for the three periods since there is an overlap of the confidence intervals of the PP's of Gondwana and Laurasia in each case.

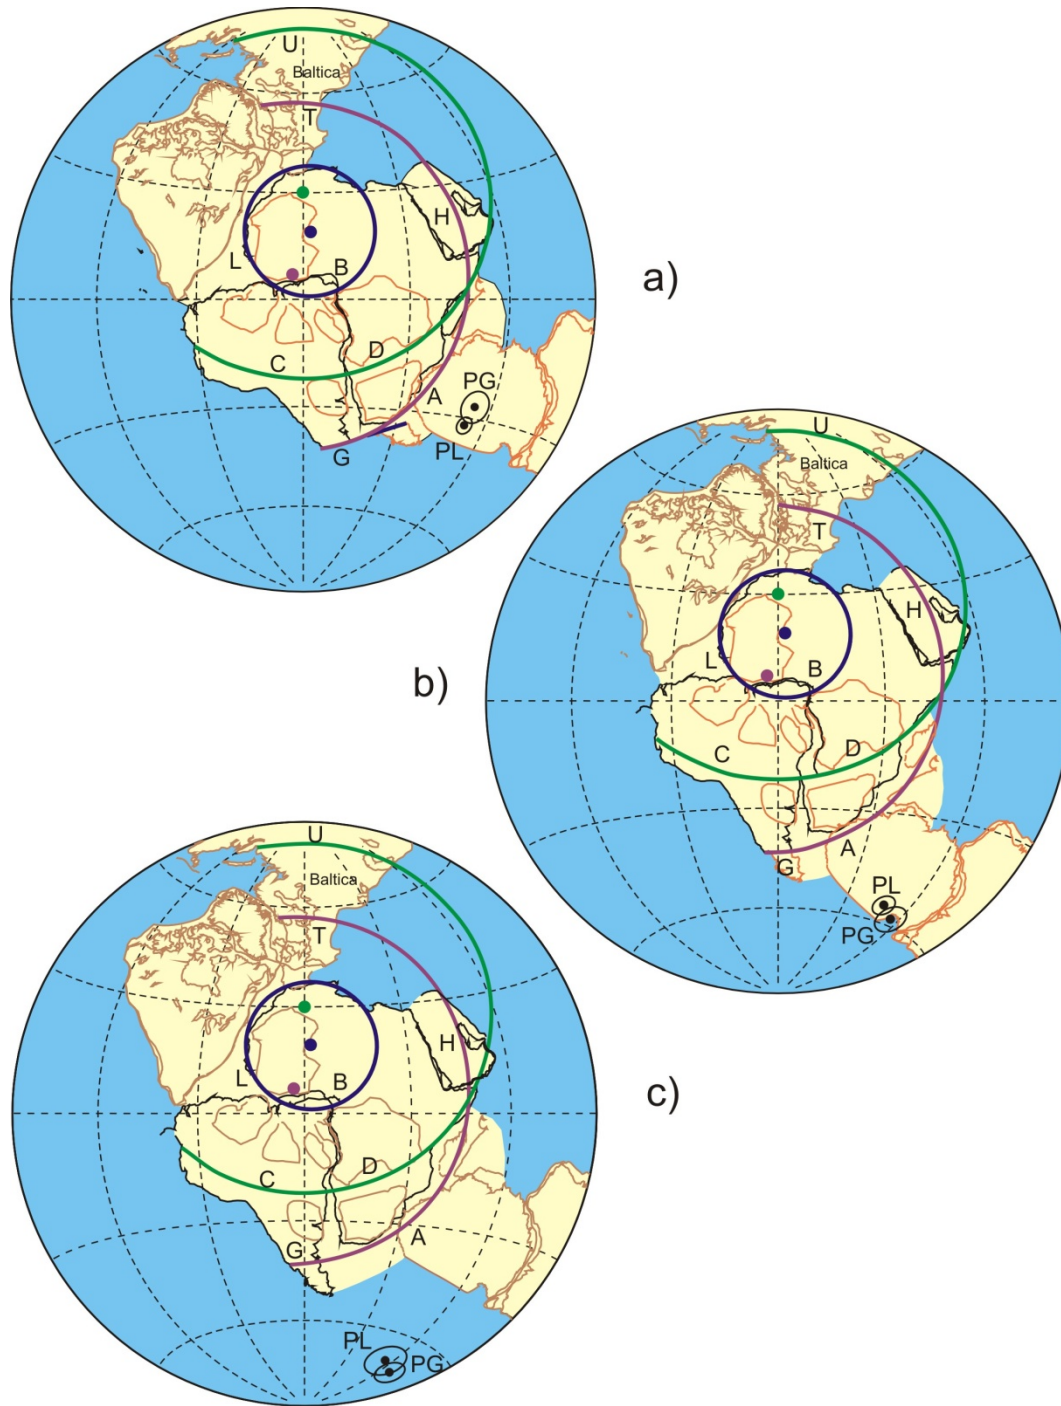

Fig. 6 SM. Models of Wegener Type Pangea in present Africa geographic coordinates, obtained by using the reconstruction parameters of Table 3 SM. PG: Mean PP of Gondwana, PL: Mean PP of Laurasia. The purple arc includes Gastre Fault Belt (G), the boundary between Africa-Madagascar and Antarctica-India (A), the Arabian “Hercynian” Orogeny (H) and the Trans-European Suture Zone (T). The green arc includes the Guapiara-Curitiba Fault Zone (C), the Damara Mobile Belt (D) and Ural Mountains (U). The blue circumference includes the Benue Trough (B) and boundary between Africa and Laurasia (L). a) Early Pennsylvanian - Early Guadalupian time span (about 320 – 270 Ma). b) Late Guadalupian – Middle Triassic time span (about 260 – 240 Ma). c) Late Triassic – Middle Jurassic time span (about 230 – 160 Ma). Note the overlap of the confidence intervals of the mean PP’s for every time span.



### ***Absolute Reconstructions (latitudinal and longitudinal)***

To determine the displacement vectors of Gondwana and make the presented geodynamic analysis, three absolute reconstructions of Gondwana were made based on the mean PP's for each period. For that purpose we considered, following Scotese (2001) and others, that Africa had a negligible longitudinal motion at least from the formation of Pangea (Burke and Torsvik 2004, Torsvik *et al.* 2008).

Although our pole selection may differ from other previous selections (for example by Scotese 2001, Kent and Irving 2010, Torsvik *et al.* 2012, among others), the overall appearance of the reconstructions are roughly similar to ours, which means that the gross trends of Gondwana / Pangea drift are evident independent of the differences in selected poles; also the discrepancies between poles of different plates are visible no matter the selection used. The improvement achieved in grouping of paleomagnetic poles supports the plausibility of our hypothesis of internal deformation of plates along focused belts, compatible with geological evidence.

### **Supplementary Material References**

Alvey, A. 2009. Using crustal thickness and continental lithosphere thinning factors from gravity inversion to refine plate reconstruction models for the Arctic and North Atlantic. Tesis Doctoral, Universidad de Liverpool (inédita), 189 p, Liverpool.

Aubele, K., Bachtadse, V., Muttoni, G., Ronchi, A. and Durand, M., 2012, A Paleomagnetic study of Permian and Triassic rocks from the Toulon-Cuers basin, SE France: Evidence for intra-Pangea block rotations in the Permian, *Tectonics* v. 3, TC3015, doi:10.1029/2011TC003026.

Bazhenov, M.L., Grishanov, A.N., Van der Voo, R. and Levashova, N.M., 2008. Late Permian paleomagnetic data east and west of the Urals. *Geophysical Journal International*, v.173, p. 395–408.

Bilardello, D. and Kodama, K.P., 2010a. A new inclination shallowing correction of the Mauch Chunk Formation of Pennsylvania, based on high-field AIR results: implications for the Carboniferous North American APW path and Pangea reconstructions. *Earth and Planetary Science Letters*, v. 299, p.218–227.

Bilardello, D. and Kodama, K.P., 2010b. Palaeomagnetism and magnetic anisotropy of Carboniferous red beds from the maritime provinces of Canada: evidence for shallow palaeomagnetic inclinations and implications for North American apparent polar wander. *Geophysical Journal International*, v. 180, p. 1013–1029.

Brandt, D., Ernesto, M., Rocha-Campos, A.C. and Dos Santos, R. 2009. Paleomagnetism of the Santa Fé Group, central Brazil: implications for the late Paleozoic Apparent Polar Wander path for South America. *Journal of Geophysical Research* 114. B02101 <http://dx.doi.org/10.1029/2008JB005735>.

Burke, K. and Torsvik, T.H. 2004, Derivation of Large Igneous Provinces of the past 200 million years from long-term heterogeneities in the deep mantle. *Earth and Planetary Science Letters* v. 227, p. 531-538.

Bylund, G., and Halvorsen, E., 1993. Palaeomagnetic study of Mesozoic basalts from Scania, southernmost Sweden, *Geophysical Journal International*, v. 114, p. 138–144.

Carporzen, L., and Gilder, S. A., 2006. Evidence for coeval Late Triassic terrestrial impacts from the Rochechouart (France) meteorite crater, *Geophys. Res. Lett.*, 33, L19308, doi:10.1029/2006GL027356.

Clark, D.A. and Lackie, M.A, 2003, Palaeomagnetism of the Early Permian Mount Leyshon Intrusive Complex and Tuckers Igneous Complex, North Queensland, Australia: *Geophysical Journal International*, v. 153, p. 523-547.

Dalrymple, G. B., Grommé, C. S. and White, R. W., 1975. Potassium argon age and paleomagnetism of diabase dikes in Liberia: Initiation of central Atlantic rifting, *Geological Society of America Bulletin*, v. 86, p. 399–411.

De Kock, M.O. and Kirschvink, J.L. 2004. Paleomagnetic constraints on the Permian-Triassic boundary in terrestrial strata of the Karroo Supergroup, South Africa: implications for causes of the end-Permian extinction event. *Gondwana Research*, v. 7, p. 175-183.

Derder, M.E.M., Henry, B., Bayou, B., Djellit, H. and Amenna, M. 2001. New Moscovian palaeomagnetic pole from the Edjeleh fold (Saharan craton, Algeria) *Geophysical Journal International*, v.147 (2), p 343-355.

Derder, M.E.M., Henry, B., Amenna, M., Bayou, B., Djellit, H., Guemache, M.A. and Hemmi, A. 2009. New structural implications for the central Sahara (Algeria), from the revisited Upper Carboniferous “Hassi Bachir” formation: paleomagnetic constraints. *Tectonophysics*, v. 463, p. 69–76.

Domeier, M., Van der Voo, R., Tohver, E., Tomezzoli, R.N., Vizán, H., Torsvik, T.H. and Kirshner, J.A., 2011, New Late Permian constraint on the apparent polar wander path of Gondwana: *Geochemistry Geophysics Geosystems*, v. 12, doi:10.1029/2011GC003616.

Domeier, M., Van der Voo, R., Tomezzoli, R.N., Tohver, E., Hendriks, B., Torsvik, T., Vizán, H. and Domínguez, A. 2012b. Support for an “A-type” Pangea reconstruction from high-fidelity Late Permian and Early to Middle Triassic paleomagnetic data from Argentina. *Journal of Geophysical Research* v. 116, B12114, doi:10.1029/2011jb008495.

Ernesto, M., Bellieni, G., Piccirillo, E. M., Marques, L. S., Min, A. D., Pacca, I. G., Martins, G. and Macedo, J. W. P. 2003. Paleomagnetic and geochemical constraints on the timing and duration of the CAMP activity in northeastern Brazil, in *The Central Atlantic Magmatic Province: Insights from Fragments of Pangea*, *Geophysical Monogr. Ser.*, vol. 136, edited by W. E. Hames et al., pp. 129–149, AGU, Washington, D. C.

- Fisher, R., 1953, Dispersion on a sphere. *Proceedings of the Royal Society of London, Serie A* 217, p. 295-305.
- Gallet, Y. and Pavlov, V., 1996. Magnetostratigraphy of the Moyero River Section (North-Western Siberia): constraints on geomagnetic reversal frequency during the early Palaeozoic. *Geophysical Journal International*, v. 125, 95–105.
- Geuna, S.E., Escosteguy, L.D. and Limarino, C.O., 2010, Paleomagnetism of the Carboniferous-Permian Patquía Formation, Paganzo basin, Argentina: implications for the apparent polar wander path for South America and Gondwana during the Late Palaeozoic: *Geologica Acta*, v. 8, p. 273-297.
- Hailwood, E. A., and Mitchell, J. G., 1971. Palaeomagnetic and radiometric dating results from Jurassic intrusions in south Morocco, *Geophysical Journal of the Royal Astronomical Society*, v. 24, p. 351–364.
- Hallam, A. 1983. Supposed Permo-Triassic megashear between Laurasia and Gondwana. *Nature*, v.301, p. 499–502.
- Hames, W. E., Renne, P. R. and Ruppel, C., 2000. New evidence for geologically instantaneous emplacement of earliest Jurassic central Atlantic magmatic province basalts on the North American margin, *Geology*, v. 28, p. 859–862.
- Hargraves, R. B., Rehacek, J. and Hooper, P. R., 1997. Palaeomagnetism of the Karoo igneous rocks in southern Africa, *South African Journal of Geology*, v. 100, p. 195–212.
- Hargraves, R. B., Briden, J. C. and Daniels, B. A., 1999. Palaeomagnetism and magnetic fabric in the Freetown Complex, Sierra Leone. *Geophysical Journal International*, v. 136, p. 705–713.
- Hodych, J. P., and Dunning, G. R. , 1992. Did the Manicouagan impact trigger end of Triassic mass extinction?, *Geology*, v. 20, p. 51–54.
- Iglesia Llanos, M. P., Lanza, R., Riccardi, A. C., Geuna, S., Laurenzi, M. A. and Ruffini, R. , 2003. Palaeomagnetic study of the El Quemado complex and Marifil formation, Patagonian Jurassic igneous province, Argentina, *Geophysical Journal International*, v. 154, p. 599–617.
- Irving, E. and Irving, G.A., 1982, Apparent polar wander paths: Carboniferous through Cenozoic and the assembly of Gondwana. *Geophysical Surveys*. V. 5, p. 141-188.
- Iosifidi, A.G., Mac Niocaill, C., Khramov, A.N., Dekkers, M.J. and Popov, V.V., 2010. Palaeogeographic implications of differential inclination shallowing in Permo- Carboniferous sediments from the Donets Basin, Ukraine. *Tectonophysics*, v. 490, p. 229–240.

Kent, D. V., and Olsen, P. E., 1997. Paleomagnetism of Upper Triassic continental sedimentary rocks from the Dan River-Danville rift basin (eastern North America), *Geological Society of America Bulletin*, v. 109, p. 366–377,

Kent, D. V., and Olsen, P. E., 1999. Astronomically tuned geomagnetic polarity time scale for the Late Triassic. *Journal Geophysical Research*, v.104, p. 12,831–12,841.

Kent, D. V., and Olsen, P. E., 2008. Early Jurassic magnetostratigraphy and paleolatitudes from the Hartford continental rift basin (eastern North America): Testing for polarity bias and abrupt polar wander in association with the Central Atlantic Magmatic Province. *Journal of Geophysical Research*, v. 113, B06105, doi:10.1029/2007JB005407.

Kent, D.V. and Irving, E., 2010, Influence of inclination error in sedimentary rocks on the Triassic and Jurassic apparent pole wander path for North America and implications for Cordilleran tectonics: *Journal of Geophysical Research*, v. 115, doi:10.1029/2009JB007205.

Klitgord, K.D. and Schouten, H., 1986, Plate kinematics of the Central Atlantic *in* Vogt, P.R. and Tucholke, B.E., eds., *The Geology of North America: The Western North Atlantic Region*: Boulder, Colorado, Geological Society of America, v. M., p. 351-404.

Klootwijk, C.T. 1979, A review of paleomagnetic data from the Indo-Pakistani fragment of Gondwanaland, *in* Abul Farah, A. and De Jong, A., eds., *Quetta, Geodynamics of Pakistan*. Geological Survey of Pakistan, p. 41-80.

Kodama, K.P., 2009. Simplification of the anisotropy-based inclination correction technique for magnetite- and haematite-bearing rocks: a case study for the Carboniferous Glenshaw and Mauch Chunk Formations, North America. *Geophysical Journal International*, v. 176, p. 467–477.

Lackie, M.A., 1988, The palaeomagnetism and magnetic fabric of the Late Permian Dundee Rhyodacite, New England, *in* Kleema, J.D., ed., *Tectonics and Metallogenesis: New England Orogen*, Armidale, University of New England, p. 157–165.

Lanza, R., and Zanella, E., 1993. Palaeomagnetism of the Ferrar dolerite in the northern Prince Albert Mountains (Victoria Land, Antarctica), *Geophysical Journal International*, v. 114, p. 501–511.

Laroche, A., and Currie, K. L., 1967. Paleomagnetic study of igneous rocks from the Manicouagan Structure, Quebec. *Journal of Geophysical Research*, v. 72, p. 4163–4169.

Lawver, L.A. and Scotese, C.R. 1987. A revised reconstruction of Gondwana. *in* McKenzie, G.D. (ed.) *Gondwana Six: Structure, tectonics and geophysics*. American Geophysical Union Geophysical Monograph 40: 17-23, Washington.

Liss, D., Owens, W.H. and Hutton, D.H.W., 2004. New palaeomagnetic results from the Whin Sill Complex: evidence for a multiple intrusion event and revised virtual geomagnetic poles for the Late Carboniferous for the British Isles. *Journal of the Geological Society, London* 161, 927–938.

MacDonald, W. D. and Opdyke, N.D., 1974. Triassic paleomagnetism of northern South America, *American Association of Petroleum Geology Bulletin* v. 58, p. 208–215.

Marzoli, A., Renne, P.R., Piccirillo, E. M., Ernesto M., Bellieni, G. and De Min, A., 1999, Extensive 200-Million-Year-Old Continental Flood Basalts of the Central Atlantic Magmatic Province: *Science*, v. 284, p. 616 – 618.

McElhinny M. and McFadden P., 1999. *Paleomagnetism, Continents and Oceans*. International Geophysics Series, 386 pp. Elsevier.

Meijers, M.J., Hamers, M.F., van Hinsbergen, D.J., van der Meer, D.G., Kitchka, A., Langereis, C.G., et al., 2010. New Late Paleozoic paleopoles from the Donbas Foldbelt (Ukraine): implications for the Pangea A vs. B controversy. *Earth and Planetary Science Letters*, v. 297, p. 18–33.

Montes-Lauar, C. R., Pacca, I. G. , Melfi, A. J., Piccirillo, E. M., Bellieni, G., Petrini, R. and Rizzieri, R., 1994. The Anari and Tapirapuã Jurassic formations, western Brazil: Paleomagnetism, geochemistry and geochronology, *Earth and Planetary Sciences Letters*, v. 128, p. 357–371.

Nawrocki, J., Fanning, M., Lewandowska, A., Polechonska, O. and Werner, T., 2008. Palaeomagnetism and the age of the Cracow volcanic rocks (S Poland). *Geophysical Journal International*, v. 174, p. 475–488.

Nomade, S., Theveniaut, H., Chen, Y., Pouclet, A. and Rigollet, C., 2000. Paleomagnetic study of French Guyana Early Jurassic dolerites: Hypothesis of a multistage magmatic event, *Earth and Planetary Sciences Letters*, v. 184, p. 155–168.

Opdyke, N. D., and Wensink, H., 1966. Paleomagnetism of rocks from the White Mountain Plutonic-Volcanic series in New Hampshire and Vermont. *Journal of Geophysical Research*, v. 71, p. 3045–3051.

Oviedo, E.S. and Vilas, J.F.A., 1984, Movimientos recurrentes en el Permo-Triásico entre el Gondwana Occidental y el Oriental. San Carlos de Bariloche, 9° Congreso Geológico Argentino, Actas 3, p. 97-114.

Pastor Galán, D. 2012. Evolución geodinámica del Oroclinal Ibero Armoricano. Geología estructural, modelización análoga y geocronología. Tesis Doctoral, Universidad de Salamanca (unpublished), 187 p, Salamanca.

Pavlov, E., Courtillot, V., Bazhenov, M.L. and Veselovsky, R.V. 2007. Paleomagnetism of the Siberian Traps; new data and a new overall 250 Ma pole for Siberia. *Tectonophysics*, v. 443, p.72–92.

Pindell, J. and Dewey, J.F. 1982, Permo-Triassic reconstruction of western Pangea and the evolution of the gulf of Mexico/Caribbean region. *Tectonics* v.1, p. 179-211.

Plummer, Ph. S. and Belle, E.R., 1995, Mesozoic tectono-stratigraphic evolution of the Seychelles microcontinent. *Sedimentary Geology*, v. 96, p. 73-91.

Prévot, M., and McWilliams, M., 1989. Paleomagnetic correlation of the Newark Supergroup volcanics, *Geology*, v. 17, p. 1007–1010.

Rabinowitz, P.R. and LaBreque, J., 1979, The Mesozoic South Atlantic ocean and evolution of its continental margins, *Journal of Geophysical Research*, v. 84, p. 5973-6002.

Rakotosolof, N.A., Tait, J.A., Carlotto, V. and Cárdenas, J. 2006. Palaeomagnetic results from the Early Permian Copacabana Group, southern Peru: implication for Pangea palaeogeography. *Tectonophysics*, v. 413, p. 287–299.

Rapalini, A.E. and Vizán, H. 1993. Evidence of intrapangaea movements in Gondwanaland: Comtes Rendus, 12° International Congress of the Carboniferous and Permian Stratigraphy and Geology, Buenos Aires, p. 405-434,

Rapalini, A.E., Tarling, D.H., Turner, P., Flint, S. and Vilas, J.F. 1994. Paleomagnetism of the Carboniferous Tepuel Group, central Patagonia, Argentina. *Tectonics*, v. 13, p. 1277-1294.

Rapalini, A.E., Fazzito, S. and Orue, D., 2006. A new Late Permian paleomagnetic pole for stable South America; the Independencia Group, eastern Paraguay. *Earth, Planets and Space* v.58, p.1247–1253.

Robertson, W. A., 1967. Manicouagan, Quebec, paleomagnetic results, *Canadian Journal of Earth Sciences*, v. 4, p. 641–649.

Schandelmeier, H., Bremer, F. and Holl, H.-G., 2004, Kinematic evolution of the Morondava rift basin of SW Madagascar – from wrench tectonics to normal extension. *Journal of African Earth Sciences*. v.38, p. 321–330.

Schmidt, P. W., 1976. The non-uniqueness of the Australian Mesozoic paleomagnetic pole position, *Geophysical Journal of the Royal Astronomical Society*, v. 47, 285–300.

Schmidt, P. W., 1982., Linearity spectrum analysis of multicomponent magnetizations and its application to some igneous rocks from southeastern Australia, *Geophysical Journal of the Royal Astronomical Society*, v.70, p. 647–665.

Schmidt, P. W., and McDougall, I., 1977. Palaeomagnetic and potassium argon dating studies of the Tasmanian dolerites, *Journal of the Geological Society of Australia*, v. 24, p. 321–328.

Sichler, B., and Perrin, M., 1993. New early Jurassic paleopole from France and Jurassic apparent polar wander, *Earth and Planetary Sciences Letters*, v. 115, p. 13–27.

Sichler, B., Olivet, J.L., Auzende, J.M., Jonquet, H., Bonnin, J. and Bonifay, A. 1980, Mobility of Morocco, *Canadian Journal of Earth Sciences*, v. 17, p. 1546–1558.

Sichler and Perrin (1993)

Smith A.G. and Hallam, A., 1970, The fit of the southern continents, *Nature* v. 225, p. 139–144.

Symons, D.T.A., Bormann, R.E. and Jans, R.P., 1989. Paleomagnetism of the Triassic red beds of the lower Fundy Group and Mesozoic tectonism of the Nova Scotia Platform, Canada. *Tectonophysics*, v. 164, p.13–24.

Szurliés, M., 2004. Magnetostratigraphy; the key to a global correlation of the classic Germanic Trias; case study Volpriehausen Formation (middle Buntsandstein), central Germany. *Earth and Planetary Science Letters* v. 227, p.395–410.

Szurliés, M., Bachmann, G.H., Menning, M., Nowaczyk, N.R. and Kaeding, K.C., 2003. Magnetostratigraphy and high-resolution lithostratigraphy of the Permian-Triassic boundary interval in central Germany. *Earth and Planetary Science Letters* v.212, p. 263–278.

Tauxe, L. and Kent, D.V. 2004, A simplified statistical model for the geomagnetic field and the detection of shallow bias in paleomagnetic inclinations: was the ancient magnetic field dipolar?, Time scales of the paleomagnetic field. *American Geophysical Union Geophysical Monograph* 145, p. 101–115.

Tomezzoli, R.N., Vizán, H., Tickij, H. and Woroszylo, M.E. 2013. Revisión de la posición del polo paleomagnético de Sierra Chica, La Pampa, Argentina, en la curva de desplazamiento polar aparente del Gondwana sudoccidental. *Latinmag Letters, Special Issue, Proceedings* Montevideo, Uruguay, v. 3, p. 1-8.

Torsvik, T.H., Muller, R.D., Van der Voo, R., Steinberger, B. and Gaina, C., 2008. Global plate motion frames: toward a unified model. *Reviews of Geophysics* v. 46, p. 1–44.

Torsvik, T.H., Van der Voo, R., Preeden, U., Mac Niocaill, C., Steinberger, B., Doubrovine, P.V., van Hinsbergen, D.J., Domeier, M., Gaina, C., Tohver, T., Meert, J.G., McCausland, P.J.A. and Cocks, R.M. 2012. Phanerozoic polar wander, palaeogeography and dynamics. *Earth-Science Reviews* v. 114, p. 325–368.

Unterneher, P., Curie, D., Olivet, J.L., Goslin, J. and Beuzart, P. 1988. South Atlantic fits and intraplate boundaries in Africa and South America. *Tectonophysics* v.155, p.169-179.

Van der Voo, R., 1990, Phanerozoic Paleomagnetic Poles from Europe and North America and comparisons with continental reconstructions, *Reviews of Geophysics*, v. 28, p. 167-206.

Van der Voo, R., 1993, *Paleomagnetism of the Atlantic, Tethys and Iapetus Oceans*: Cambridge, Cambridge University Press, 411 p.

Van Fossen, M. C., and Kent, D. V., 1990. High-latitude palaeomagnetic poles from Middle Jurassic plutons and moat volcanics in New England and the controversy regarding Jurassic apparent polar wander for North America, *Journal of Geophysical Research*, v. 95, p. 17,503–17,516

Vizán, H., 1998. Paleomagnetism of the Lower Jurassic Lepá and Osta Arena formations, Argentine Patagonia, *Journal of South America Earth Sciences*, v. 11, p. 333–350.

Walderhaug, H.J., Eide, E.A., Scott, R.A., Inger, S. and Golionko, E.G., 2005. Paleomagnetism and  $^{40}\text{Ar}/^{39}\text{Ar}$  geochronology from the South Taimyr igneous complex, Arctic Russia; a Middle–Late Triassic magmatic pulse after Siberian flood-basalt volcanism. *Geophysical Journal International*, v. 163, p. 501–517.

Weil, A.B., Van der Voo, R. and van der Pluijm, B.A., 2001. Oroclinal bending and evidence against the Pangea megashear: the Cantabria–Asturias Arc (northern Spain). *Geology*, v. 29 (11), p. 991–994.

Yuan, K., Van der Voo, R., Bazhenov, M.L., Bakhmutov, V., Alekhin, V. and Hendriks, B.W.H., 2011. Permian and Triassic paleolatitudes of the Ukrainian Shield with implications for Pangea reconstructions. *Geophysical Journal International*, v. 184, p.595–610.

Zaffarana, C. and Somoza, R. 2012. Palaeomagnetism and  $^{40}\text{Ar}/^{39}\text{Ar}$  dating from Lower Jurassic rocks in Gastre, central Patagonia: further data to explore tectonomagmatic events associated with the break-up of Gondwana. *Journal of the Geological Society, London*, doi:10.1144/0016-76492011-089.
